# Supplementary material for: Pattern recognition as a new strategy in high-resolution spectroscopy: application to methanol OH-stretch overtones
Source: Royal Society of Chemistry journal article supplement (doi:10.1039/d1cp02639a), 2021-01-01
Supplement: d1cp02639a1.pdf [file d1cp02639a1.pdf]

## Electronic Supplementary Information for article:

### Pattern recognition as a new strategy in high-resolution spectroscopy: Application to methanol OH-stretch overtones.

Jozef Rakovský,<sup>a</sup> Vít Svoboda,<sup>a,b</sup> Veronika Horká-Zelenková<sup>a,c</sup>, and Ondrej Votava,<sup>\*a</sup>

<sup>a</sup> J. Heyrovský Institute of Physical Chemistry of the ASCR, v.v.i., Dolejškova 2155/3, 182 23 Prague 8, Czech Republic

<sup>b</sup> Laboratory of Physical Chemistry, ETH Zürich, Vladimir-Prelog-Weg 2, 8093 Zürich, Switzerland

<sup>c</sup> ASCR, Institute of Physics, v.v.i., Na Slovance 1999/2, 182 21 Prague 8, Czech Republic

\* E-mail: [ondrej.votava@jh-inst.cas.cz](mailto:ondrej.votava@jh-inst.cas.cz)

#### 1 Measured spectrum

Figure 1 shows a zoomed view of the methanol spectrum between  $7200.6\text{ cm}^{-1}$  and  $7200.9\text{ cm}^{-1}$  measured at 19 K. Despite this low temperature, the spectrum is highly congested with ro-vibrational lines (26 lines in  $0.3\text{ cm}^{-1}$ ). The figure demonstrates the complexity of overtone spectra which makes any traditional assignment procedures impossible.

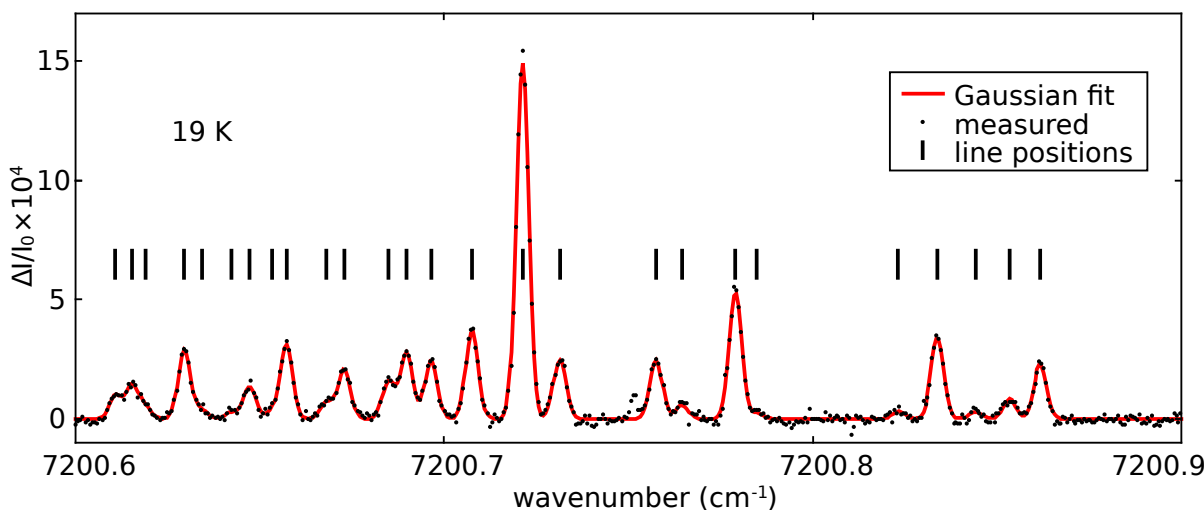

**Figure 1** A detail of the methanol spectrum measured between  $7200.6\text{ cm}^{-1}$  and  $7200.9\text{ cm}^{-1}$  at 19 K. Measured data (black points) and multi-Gaussian fit (red solid line) are shown together with line positions marked as black vertical lines. In total, 26 lines are fitted in this portion of the spectrum. Line widths are fixed to a value corresponding to the temperature of 19 K.

#### 2 Graphical representation of methanol multiplets

Figure 2 shows a schematic diagram of rotational states for both *A* and *E* symmetry components of methanol. Each rotational state is represented by a black horizontal line. All states are organized according to their respective *J* and *K* rotational quantum numbers into a matrix-like form with *J* decreasing along the rows and *K* increasing along the columns. For *K* > 0, the *A* states are additionally split into doublets denoted as *A*+ and *A*−, respectively, and displayed in the diagram as two closely spaced lines. Since the rotational structure is the same in both upper and lower vibrational states, they can be represented by the same diagram.

The well-known rotational selection rules for methanol enable to visualize all allowed transition from a particular lower ro-vibrational state (with given *J*' and *K*') using a 'selection rule stencil' represented by red dots in Figure 2. Methanol multiplets have between 2 and 9 transitions for *A* component, and between 3 to 8 transitions for *E* component, respectively. When a given stencil is overlaid with the diagram for the upper ro-vibrational state and centered on a corresponding upper rotational state with same quantum numbers *J*' and *K*' (thick horizontal line), all allowed transitions can be easily deduced. If a red dot falls on a particular rotational state in the diagram, there is an allowed transition between the respective lower and upper rotational state. The transition may or may not be observed in a measured spectrum depending on several factors such as cross-section and experimental signal-to-noise ratio.

A lot of information about the multiplets can be deduced from the graphical representation. For example, some transitions are unique to a particular multiplet. This allows to unambiguously assign a multiplet even if not all lines from the multiplet are observed in the spectrum. These unique lines tend to lie in the corners of the stencil. Furthermore, shared transitions between two different multiplets can be visualized as well using two stencils. Figure 3 shows four real scenarios. Two stencils are highlighted in red circles and black rectangles, respectively. In these scenarios, if a particular line is found in the measured spectrum, the circle or rectangle is filled otherwise the mark is empty. For example, in scenario A, two stencils represent upper state multiplets (3, 1, *A*+) and (3, 2, *A*+) sharing mutually six lower rotational states and six ro-vibrational transitions. Similar results can be obtained for the remaining scenarios B - D. It can be shown, that two different multiplets can share a maximum of 6 and 4 lower rotational states for *A* and *E* component, respectively.

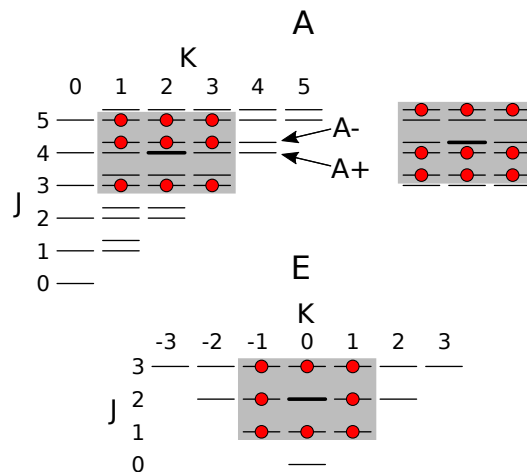

**Figure 2** A graphical representation of multiplets with the highest possible number of lines, showing three 'selection rule stencils' (for  $A+$ ,  $A-$  and  $E$  symmetry states, respectively) suitable for the generation of any methanol multiplet. Thin lines represent energy states, thick lines mark the selected upper state and circles indicated all lower states of the multiplet for a given upper state.

### 3 Reduced energy plots

Every unique multiplet determines the energy and rotational assignment of a single excited ro-vibrational state. Vibrational assignments however can only be inferred if a regular progressions of rotational states are observed. To visualize such progressions, it is useful to collect the identified upper rotational states in the form of reduced energy plots, as discussed in the section 5.2 of the paper. Reduced energies of rotational states belonging to the same vibration should vary only slightly as a function of  $J'$  and thus the progressions are observed as almost horizontal lines across the reduced energy plots. Here we discuss, how the reduced energy plots have been used to determine correct rotational assignments for non-unique patterns observed in the measured spectrum. First, we construct the plots using only the patterns that uniquely determine their multiplets. This creates a back-bone of reliably assigned states, where the major progressions can be easily followed. Then, the correct rotational assignments for non-unique patterns, where several rotational assignments are possible, are determined.

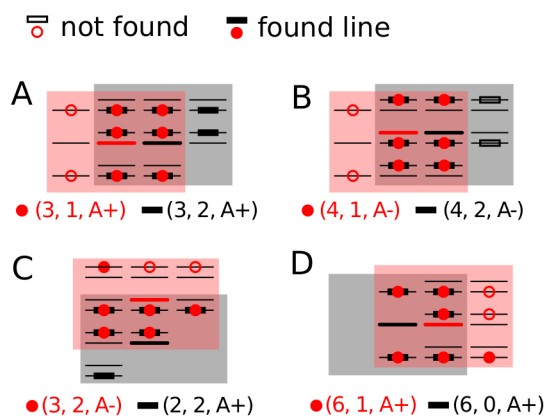

**Figure 3** A graphical representation of four non-unique pattern scenarios (A - D) considered in the analysis of the methanol spectrum. The scenarios demonstrate possible difficulties during the multiplet assignments due to mutual sharing of lower rotational states between different multiplets (here represented in red and black). The shared states are located in the intersection between two rectangular boxes representing individual multiplets. Full labels represent lines identified in the spectrum, while unobserved transitions are shown as empty symbols.

For illustration, several such cases are shown in Figure 3. For comparison panel A shows situation where two multiplets share 6 transitions, however two distinguishing transitions are observed allowing unique assignment. In contrast panel B is a case where none of the distinguishing lines have been observed and thus the pattern recognition method cannot distinguish between the two possibilities. In this case, the reduced energy plot allows to make the final assignment by following the regular progressions. As pointed out in the Figure 4, where based on this additional information, the  $(4, 2, A-)$  multiplet is assigned as the correct one.

Panels C and D show situation, where an extra line is assigned to a pattern due to a accidental coincidence making the assignment either ambiguous (C) or incorrect (D). Specifically in panel C,  $(3, 2, A-)$  and  $(2, 2, A+)$  multiplets are show sharing 5 lower rotational states. In addition, two other lines are found each indicating different assignments. Thus the pattern recognition method cannot distinguish these two multiplets from each other. However,  $(3, 2, A-)$  multiplet cannot be the correct assignment since it does not

follow any of the previously identified progression, see Figure 4. Therefore, we can conclude that the correct assignment is (2, 2, A+) multiplet.

Finally in panel D, (6, 1, A+) and (6, 0, A+) multiplets are shown sharing 5 lower rotational states. Moreover, (6, 1, A+) multiplet has one additional line found in the measured spectrum. Therefore, the pattern recognition method would assign this multiplet as an unique one. However, this assignment is incorrect due to an accidental coincidence in the pattern. This has been again inferred from the reduced energy plot in Figure 4, where this assignment as (6, 1, A+) multiplet does not fall into any previously identified progression. Thus, the correct assignment is (6, 0, A+) multiplet as confirmed by the progression in the reduced energy plot.

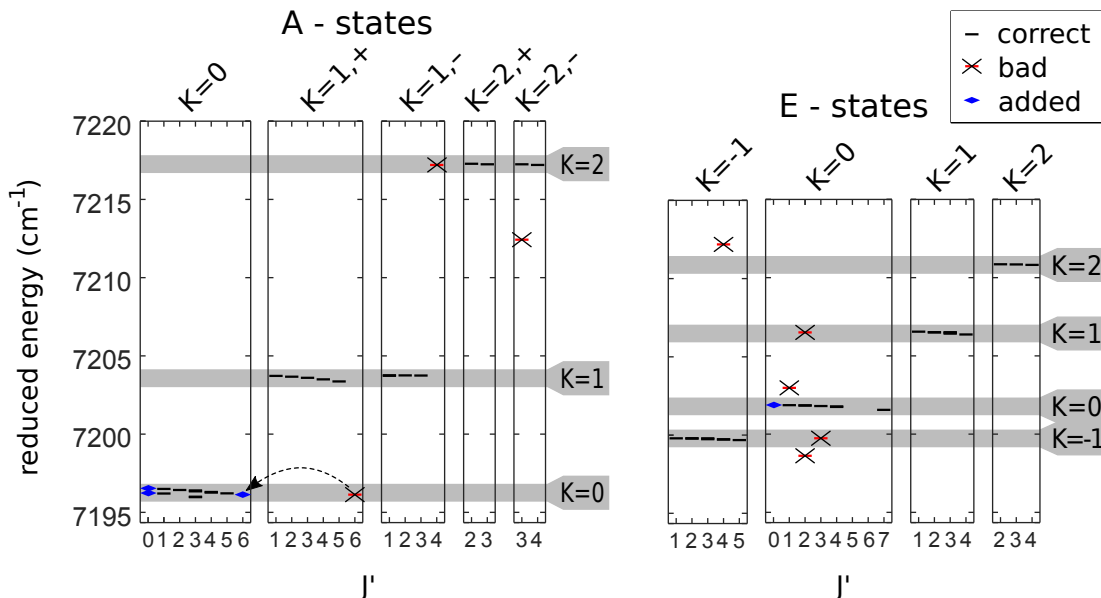

**Figure 4** The reduced energy plots for final set of all identified multiplets. The black and red dashes mark the multiplets fulfilling all defined criteria resulting from automated data manipulation. The blue diamonds mark the multiplets added later manually. Each plot is associated with different  $K$  quantum number and  $A_{\pm}$  or  $E$  symmetry. Horizontal,  $1 \text{ cm}^{-1}$  wide gray bars highlight progressions labeled by their relation to quantum number  $K$ .

#### 4 Complete list of reliably identified multiplets

Table 1 summarizes all assigned multiplets in the methanol spectrum in the first OH-stretch overtone region,  $2\nu_{\text{OH}}$ , between  $7170 \text{ cm}^{-1}$  and  $7220 \text{ cm}^{-1}$ . In total, all multiplets represent 37 upper rotational states. The table is organized as follows. Each multiplet is associated with its upper rotational state (first column). Some of these multiplets appear more than once in the spectrum (1 - 4 times). Their respective upper rotational energies are listed in the second column. The remaining columns represent line positions in the measured spectrum (bottom row), used in the identification of the respective multiplets, together with their lower rotational state energies and quantum numbers (top row).

For example, upper rotational state (0, 0, A+) is listed in the first entry of Table 1. Altogether, two upper energies ( $7196.5368 \text{ cm}^{-1}$  and  $7196.2342 \text{ cm}^{-1}$ ) have been identified suggesting at least two upper vibrational states in the measured spectral range. Each state (multiplet) has two transitions in the spectrum, originating from (1, 0, A+) and (1, 1, A+) lower rotational states with energies of  $1.6135 \text{ cm}^{-1}$  and  $11.7049 \text{ cm}^{-1}$ , respectively.

**Table 1** A final list of all assigned multiplets. Information on how to read the table is given in Section 4.

| upper state | $E'$ ( $\text{cm}^{-1}$ )                        | lower state, $E''$ ( $\text{cm}^{-1}$ ), lines( $\text{cm}^{-1}$ ) |                        |                        |                        |                        |                       |                       |                       |                      |
|-------------|--------------------------------------------------|--------------------------------------------------------------------|------------------------|------------------------|------------------------|------------------------|-----------------------|-----------------------|-----------------------|----------------------|
| (0, 0, A+)  | 7196.5368<br>7196.2342                           | (1, 0, A+)<br>1.6135                                               | (1, 1, A+)<br>11.7049  |                        |                        |                        |                       |                       |                       |                      |
|             |                                                  | 7194.9234<br>7194.621                                              | 7184.8318<br>7184.529  |                        |                        |                        |                       |                       |                       |                      |
| (1, 0, A+)  | 7198.1141<br>7197.821                            | (0, 0, A+)<br>0                                                    | (1, 1, A-)<br>11.7328  | (2, 0, A+)<br>4.8405   | (2, 1, A+)<br>14.9043  |                        |                       |                       |                       |                      |
|             |                                                  | 7198.1143<br>7197.8212                                             | 7186.3813<br>7186.0882 | 7193.2738<br>7192.9806 | 7183.2096<br>7182.9163 |                        |                       |                       |                       |                      |
| (1, 1, A-)  | 7205.3774<br>7205.3451                           | (1, 0, A+)<br>1.6135                                               | (1, 1, A+)<br>11.7049  | (2, 1, A-)<br>14.9878  | (2, 2, A-)<br>31.049   |                        |                       |                       |                       |                      |
|             |                                                  | 7203.7636<br>7203.7319                                             | 7193.6725<br>7193.6402 | 7190.3897<br>7190.3571 | 7174.3287<br>7174.2962 |                        |                       |                       |                       |                      |
| (1, 1, A+)  | 7205.3378                                        | (0, 0, A+)<br>0                                                    | (1, 1, A-)<br>11.7328  | (2, 0, A+)<br>4.8405   | (2, 1, A+)<br>14.9043  | (2, 2, A+)<br>31.049   |                       |                       |                       |                      |
|             |                                                  | 7205.3375                                                          | 7193.605               | 7200.4974              | 7190.4335              | 7174.2889              |                       |                       |                       |                      |
| (2, 0, A+)  | 7201.2804                                        | (1, 0, A+)<br>1.6135                                               | (1, 1, A+)<br>11.7049  | (2, 1, A-)<br>14.9878  | (3, 0, A+)<br>9.6806   | (3, 1, A+)<br>19.7031  |                       |                       |                       |                      |
|             |                                                  | 7199.6671                                                          | 7189.5756              | 7186.2927              | 7191.5998              | 7181.577               |                       |                       |                       |                      |
| (2, 1, A-)  | 7208.6037                                        | (1, 1, A-)<br>11.7328                                              | (2, 0, A+)<br>4.8405   | (2, 1, A+)<br>14.9043  | (2, 2, A+)<br>31.049   | (3, 1, A-)<br>19.8701  | (3, 2, A-)<br>35.8898 |                       |                       |                      |
|             |                                                  | 7196.8708                                                          | 7203.7636              | 7193.6991              | 7177.555               | 7188.7332              | 7172.7138             |                       |                       |                      |
| (2, 1, A+)  | 7208.521                                         | (1, 0, A+)<br>1.6135                                               | (1, 1, A+)<br>11.7049  | (2, 1, A-)<br>14.9878  | (2, 2, A-)<br>31.049   | (3, 0, A+)<br>9.6806   | (3, 1, A+)<br>19.7031 | (3, 2, A+)<br>35.8902 | (3, 3, A+)<br>44.2928 |                      |
|             |                                                  | 7206.9076                                                          | 7196.816               | 7193.5332              | 7177.4723              | 7198.8405              | 7188.8177             | 7172.6308             |                       |                      |
| (2, 2, A+)  | 7222.1281                                        | (1, 1, A+)<br>11.7049                                              | (2, 1, A-)<br>14.9878  | (2, 2, A-)<br>31.049   | (3, 1, A+)<br>19.7031  | (3, 2, A+)<br>35.8902  | (3, 3, A+)<br>44.2928 |                       |                       |                      |
|             |                                                  | 7210.4231                                                          | 7207.1404              | 7191.0788              | 7202.4257              | 7186.2377              | 7177.8352             |                       |                       |                      |
| (3, 0, A+)  | 7206.1036<br>7206.0452<br>7205.7019<br>7205.6741 | (2, 0, A+)<br>4.8405                                               | (2, 1, A+)<br>14.9043  | (3, 1, A-)<br>19.8701  | (4, 0, A+)<br>16.1335  | (4, 1, A+)<br>26.1012  |                       |                       |                       |                      |
|             |                                                  | 7201.2634                                                          | 7191.1994              | 7186.2333              | 7189.9699              | 7180.0025              |                       |                       |                       |                      |
|             |                                                  | 7201.2049                                                          | 7191.1407              | 7186.175               | 7189.9115              | 7179.9441              |                       |                       |                       |                      |
|             |                                                  | 7200.8617                                                          | 7190.7976              | 7185.8318              | 7189.5684              | 7179.6005              |                       |                       |                       |                      |
|             |                                                  | 7200.8338                                                          | 7190.7698              | 7185.8038              | 7189.5403              | 7179.5733              |                       |                       |                       |                      |
| (3, 1, A-)  | 7213.4458                                        | (2, 1, A-)<br>14.9878                                              | (2, 2, A-)<br>31.049   | (3, 0, A+)<br>9.6806   | (3, 1, A+)<br>19.7031  | (3, 2, A+)<br>35.8902  | (4, 1, A-)<br>26.3795 | (4, 2, A-)<br>42.3438 |                       |                      |
|             |                                                  | 7198.4581                                                          | -                      | 7203.7656              | 7193.7429              | 7177.555               | 7187.0661             | 7171.1019             |                       |                      |
| (3, 1, A+)  | 7213.3008                                        | (2, 0, A+)<br>4.8405                                               | (2, 1, A+)<br>14.9043  | (2, 2, A+)<br>31.049   | (3, 1, A-)<br>19.8701  | (3, 2, A-)<br>35.8898  | (4, 0, A+)<br>16.1335 | (4, 1, A+)<br>26.1012 | (4, 2, A+)<br>42.345  |                      |
|             |                                                  | 7208.4604                                                          | 7198.3965              | -                      | 7193.4306              | 7177.4114              | 7197.1674             | 7187.1992             | 7170.956              |                      |
| (3, 2, A-)  | 7226.9458                                        | (2, 1, A-)<br>14.9878                                              | (2, 2, A-)<br>31.049   | (3, 1, A+)<br>19.7031  | (3, 2, A+)<br>35.8902  | (3, 3, A+)<br>44.2928  | (4, 1, A-)<br>26.3795 | (4, 2, A-)<br>42.3438 | (4, 3, A-)<br>50.7463 |                      |
|             |                                                  | 7211.9582                                                          | 7195.8968              | 7207.2427              | 7191.0558              | 7182.653               | 7200.5666             | 7184.6011             | 7176.1996             |                      |
| (3, 2, A+)  | 7226.9457                                        | (2, 1, A+)<br>14.9043                                              | (2, 2, A+)<br>31.049   | (3, 1, A-)<br>19.8701  | (3, 2, A-)<br>35.8898  | (3, 3, A-)<br>44.2928  | (4, 1, A+)<br>26.1012 | (4, 2, A+)<br>42.345  | (4, 3, A+)<br>50.7463 |                      |
|             |                                                  | 7212.0414                                                          | 7195.8968              | 7207.0755              | 7191.0558              | 7182.653               | 7200.8442             | 7184.6011             | 7176.1996             |                      |
| (4, 0, A+)  | 7212.4727<br>7212.4342                           | (3, 0, A+)<br>9.6806                                               | (3, 1, A+)<br>19.7031  | (4, 1, A-)<br>26.3795  | (5, 0, A+)<br>24.1988  | (5, 1, A+)<br>34.0983  |                       |                       |                       |                      |
|             |                                                  | 7202.7924<br>7202.7539                                             | 7192.7695<br>7192.731  | 7186.093<br>7186.0544  | 7188.2736<br>7188.2353 | 7178.3746<br>7178.3362 |                       |                       |                       |                      |
| (4, 1, A+)  | 7219.6698                                        | (3, 0, A+)<br>9.6806                                               | (3, 1, A+)<br>19.7031  | (3, 2, A+)<br>35.8902  | (4, 1, A-)<br>26.3795  | (4, 2, A-)<br>42.3438  | (5, 0, A+)<br>24.1988 | (5, 1, A+)<br>34.0983 | (5, 2, A+)<br>50.4135 |                      |
|             |                                                  | 7209.9893                                                          | 7199.9668              | 7183.7789              | 7193.2903              | 7177.3262              | 7195.471              | 7185.5714             | -                     |                      |
| (4, 2, A-)  | 7233.3726                                        | (3, 1, A-)<br>19.8701                                              | (3, 2, A-)<br>35.8898  | (3, 3, A-)<br>44.2928  | (4, 1, A+)<br>26.1012  | (4, 2, A+)<br>42.345   | (4, 3, A+)<br>50.7463 | (5, 1, A-)<br>34.5156 | (5, 2, A-)<br>50.4108 | (5, 3, A-)<br>58.813 |
|             |                                                  | 7213.5026                                                          | 7197.4829              | -                      | 7207.2715              | 7191.0272              | -                     | -                     | 7182.9611             | 7174.5603            |
| (5, 0, A+)  | 7220.4703                                        | (4, 0, A+)<br>16.1335                                              | (4, 1, A+)<br>26.1012  | (5, 1, A-)<br>34.5156  | (6, 0, A+)<br>33.8759  | (6, 1, A+)<br>43.694   |                       |                       |                       |                      |
|             |                                                  | 7204.3368                                                          | 7194.3692              | 7185.9544              | 7186.5942              | 7176.7764              |                       |                       |                       |                      |
| (5, 1, A+)  | 7227.6219                                        | (4, 0, A+)<br>16.1335                                              | (4, 1, A+)<br>26.1012  | (4, 2, A+)<br>42.345   | (5, 1, A-)<br>34.5156  | (5, 2, A-)<br>50.4108  | (6, 0, A+)<br>33.8759 | (6, 1, A+)<br>43.694  | (6, 2, A+)<br>60.0957 |                      |
|             |                                                  | 7211.4884                                                          | 7201.5208              | 7185.2764              | 7193.1061              | 7177.2118              | 7193.7462             | 7183.9275             | -                     |                      |
| (6, 0, A+)  | 7230.0902                                        | (5, 0, A+)<br>24.1988                                              | (5, 1, A+)<br>34.0983  | (6, 1, A-)<br>44.2782  | (7, 0, A+)<br>45.164   | (7, 1, A+)<br>54.8878  |                       |                       |                       |                      |
|             |                                                  | 7205.8915                                                          | 7195.992               | 7185.8117              | 7184.926               | 7175.2027              |                       |                       |                       |                      |
| (0, 0, E)   | 7201.8633                                        | (1, -1, E)<br>5.4897                                               | (1, 0, E)<br>10.7357   | (1, 1, E)<br>16.2412   |                        |                        |                       |                       |                       |                      |
|             |                                                  | 7196.3737                                                          | 7191.1274              | 7185.622               |                        |                        |                       |                       |                       |                      |

| upper state | $E'$ (cm <sup>-1</sup> )           | lower state, $E''$ (cm <sup>-1</sup> ), lines(cm <sup>-1</sup> ) |                       |                      |                       |                       |                       |                       |                      |
|-------------|------------------------------------|------------------------------------------------------------------|-----------------------|----------------------|-----------------------|-----------------------|-----------------------|-----------------------|----------------------|
| (1, -1, E)  | 7201.4086                          | (0, 0, E)<br>9.122                                               | (1, 0, E)<br>10.7357  | (2, -2, E)<br>22.841 | (2, -1, E)<br>8.7166  | (2, 0, E)<br>13.9628  |                       |                       |                      |
|             |                                    | 7192.2866                                                        | 7190.6729             | 7178.5679            | 7192.6919             | 7187.4455             |                       |                       |                      |
| (1, 0, E)   | 7203.4675                          | (0, 0, E)<br>9.122                                               | (1, -1, E)<br>5.4897  | (1, 1, E)<br>16.2412 | (2, -1, E)<br>8.7166  | (2, 0, E)<br>13.9628  | (2, 1, E)<br>19.4686  |                       |                      |
|             |                                    | 7194.3456                                                        | 7197.9778             | 7187.2262            | 7194.7509             | 7189.5047             | 7183.9986             |                       |                      |
| (1, 1, E)   | 7208.1644                          | (0, 0, E)<br>9.122                                               | (1, 0, E)<br>10.7357  | (2, 0, E)<br>13.9628 | (2, 1, E)<br>19.4686  | (2, 2, E)<br>20.3003  |                       |                       |                      |
|             |                                    | 7199.0426                                                        | 7197.4289             | 7194.2015            | 7188.6955             | 7187.8639             |                       |                       |                      |
| (2, -1, E)  | 7204.6236<br>7204.6503             | (1, -1, E)<br>5.4897                                             | (1, 0, E)<br>10.7357  | (2, -2, E)<br>22.841 | (2, 0, E)<br>13.9628  | (3, -2, E)<br>27.6819 | (3, -1, E)<br>13.5565 | (3, 0, E)<br>18.8026  |                      |
|             |                                    | 7199.134                                                         | 7193.8879             | 7181.7824            | 7190.6609             | 7176.9419             | 7191.0668             | 7185.8208             |                      |
| (2, 0, E)   | 7206.6911<br>7206.6765             | (1, -1, E)<br>5.4897                                             | (1, 0, E)<br>10.7357  | (1, 1, E)<br>16.2412 | (2, -1, E)<br>8.7166  | (2, 1, E)<br>19.4686  | (3, -1, E)<br>13.5565 | (3, 0, E)<br>18.8026  | (3, 1, E)<br>24.3097 |
|             |                                    | 7201.2009                                                        | 7195.9557             | 7190.4504            | 7197.9744             | 7187.2224             | 7193.1348             | 7187.8886             | 7182.3812            |
| (2, 1, E)   | 7211.3512<br>7211.3652             | (1, 0, E)<br>10.7357                                             | (1, 1, E)<br>16.2412  | (2, 0, E)<br>13.9628 | (2, 2, E)<br>20.3003  | (3, 0, E)<br>18.8026  | (3, 1, E)<br>24.3097  | (3, 2, E)<br>25.1412  |                      |
|             |                                    | 7200.6153                                                        | 7195.1097             | 7197.3882            | 7191.051              | 7192.5487             | 7187.041              | 7186.2107             |                      |
| (2, 2, E)   | 7215.7057                          | (1, 1, E)<br>16.2412                                             | (2, 1, E)<br>19.4686  | (3, 1, E)<br>24.3097 | (3, 2, E)<br>25.1412  | (3, 3, E)<br>42.8417  |                       |                       |                      |
|             |                                    | 7199.4644                                                        | 7196.2369             | 7191.3964            | 7190.5645             | 7172.864              |                       |                       |                      |
| (3, -1, E)  | 7209.4955<br>7209.4377             | (2, -2, E)<br>22.841                                             | (2, -1, E)<br>8.7166  | (2, 0, E)<br>13.9628 | (3, -2, E)<br>27.6819 | (3, 0, E)<br>18.8026  | (4, -2, E)<br>34.1368 | (4, -1, E)<br>20.0091 | (4, 0, E)<br>25.2542 |
|             |                                    | -                                                                | 7200.7791             | 7195.5326            | 7181.8132             | 7190.693              | 7175.3591             | 7189.4865             | -                    |
| (3, 0, E)   | 7211.4969                          | (2, -1, E)<br>8.7166                                             | (2, 0, E)<br>13.9628  | (2, 1, E)<br>19.4686 | (3, -1, E)<br>13.5565 | (3, 1, E)<br>24.3097  | (4, -1, E)<br>20.0091 | (4, 0, E)<br>25.2542  | (4, 1, E)<br>30.7644 |
|             |                                    | 7202.7807                                                        | 7197.5342             | 7192.0284            | 7197.9404             | 7187.187              | 7191.488              | 7186.2426             | 7180.7324            |
| (3, 1, E)   | 7216.1235<br>7216.2147<br>7216.186 | (2, 0, E)<br>13.9628                                             | (2, 1, E)<br>19.4686  | (2, 2, E)<br>20.3003 | (3, 0, E)<br>18.8026  | (3, 2, E)<br>25.1412  | (4, 0, E)<br>25.2542  | (4, 1, E)<br>30.7644  | (4, 2, E)<br>31.5961 |
|             |                                    | 7202.1613                                                        | 7196.655              | 7195.8223            | 7197.3209             | 7190.9825             | 7190.8694             | 7185.359              | -                    |
| (3, 2, E)   | 7220.5465                          | (2, 1, E)<br>19.4686                                             | (2, 2, E)<br>20.3003  | (3, 1, E)<br>24.3097 | (3, 3, E)<br>42.8417  | (4, 1, E)<br>30.7644  | (4, 2, E)<br>31.5961  | (4, 3, E)<br>49.2953  |                      |
|             |                                    | 7201.078                                                         | 7200.2461             | 7196.2369            | 7177.7053             | 7189.7819             | 7188.9501             | 7171.2513             |                      |
| (4, -1, E)  | 7215.9029<br>7215.8833             | (3, -2, E)<br>27.6819                                            | (3, -1, E)<br>13.5565 | (3, 0, E)<br>18.8026 | (4, -2, E)<br>34.1368 | (4, 0, E)<br>25.2542  | (5, -2, E)<br>42.2058 | (5, -1, E)<br>28.0735 | (5, 0, E)<br>33.3165 |
|             |                                    | -                                                                | 7202.347              | 7197.1007            | 7181.7655             | 7190.6487             | 7173.6971             | 7187.8291             | 7182.5862            |
| (4, 0, E)   | 7217.9073<br>7217.9397             | (3, -1, E)<br>13.5565                                            | (3, 0, E)<br>18.8026  | (3, 1, E)<br>24.3097 | (4, -1, E)<br>20.0091 | (4, 1, E)<br>30.7644  | (5, -1, E)<br>28.0735 | (5, 0, E)<br>33.3165  | (5, 1, E)<br>38.8326 |
|             |                                    | 7204.3508                                                        | 7199.1049             | 7193.5977            | 7197.8982             | 7187.1428             | 7189.8336             | 7184.5906             | 7179.0751            |
| (4, 1, E)   | 7222.5383                          | (3, 0, E)<br>18.8026                                             | (3, 1, E)<br>24.3097  | (3, 2, E)<br>25.1412 | (4, 0, E)<br>25.2542  | (4, 2, E)<br>31.5961  | (5, 0, E)<br>33.3165  | (5, 1, E)<br>38.8326  | (5, 2, E)<br>39.6651 |
|             |                                    | 7203.7362                                                        | 7198.2287             | 7197.3976            | 7197.284              | 7190.9424             | 7189.2211             | 7183.7053             | -                    |
| (4, 2, E)   | 7226.9854                          | (3, 1, E)<br>24.3097                                             | (3, 2, E)<br>25.1412  | (3, 3, E)<br>42.8417 | (4, 1, E)<br>30.7644  | (4, 3, E)<br>49.2953  | (5, 1, E)<br>38.8326  | (5, 2, E)<br>39.6651  | (5, 3, E)<br>57.3624 |
|             |                                    | 7202.6758                                                        | 7201.8446             | -                    | 7196.2211             | -                     | 7188.1522             | 7187.3201             | 7169.6233            |
| (5, -1, E)  | 7223.9347                          | (4, -2, E)<br>34.1368                                            | (4, -1, E)<br>20.0091 | (4, 0, E)<br>25.2542 | (5, -2, E)<br>42.2058 | (5, 0, E)<br>33.3165  | (6, -2, E)<br>51.8894 | (6, -1, E)<br>37.7492 | (6, 0, E)<br>42.9878 |
|             |                                    | 7189.7983                                                        | 7203.9251             | 7198.6811            | 7181.7286             | 7190.6182             | -                     | 7186.1853             | -                    |
| (7, 0, E)   | 7246.8267                          | (6, -1, E)<br>37.7492                                            | (6, 0, E)<br>42.9878  | (6, 1, E)<br>48.5142 | (7, -1, E)<br>49.0352 | (7, 1, E)<br>59.8092  | (8, -1, E)<br>61.9304 | (8, 0, E)<br>67.1503  | (8, 1, E)<br>72.7174 |
|             |                                    | 7209.0777                                                        | 7203.8387             | 7198.3129            | 7197.7911             | 7187.0169             | 7184.8964             | 7179.6767             | -                    |
